# Supplementary material for: Workplace violence against mental health professionals in AddisAbaba, Ethiopia: a facility-based qualitative study
Source: Research Square preprint supplement (doi:10.21203/rs.3.rs-8632851/v1), 2026-02-11
Supplement: Supplementary file 1 [file 4d168e4b28150888780c6201.docx]

Supplementary file

**Annex I- Information Sheet**

Introduction: This is an information sheet on research that will address the perception and

attitudes of psychiatry nurses, clinical nurses and psychiatry residents in Ethiopia. It will be a qualitative study.

Purpose of the study: The aim of this study is to assess perceptions of mental health workers including psychiatry residents and psychiatry nurses/clinical nurses at SPHMMC in Addis Ababa

Ethiopia on mental health violence

Procedure: Researched obtained ethical clearance from research and ethic committee of Saint Paul’s Hospital Millennium Medical College board a formal written review consent from each respondent just prior to the actual data collection.

Risk: The study will take place after you give permission by asking your permission with an already prepared and structured guide. This also includes attending group discussions focused on in-depth interviews. There will be no physical or psychological harm during the procedure.

Besides, you have full right to stop any time you wish, and you won’t be obliged to give any information and the time you will be investing in taking part in the study or you let us know if you don’t want to answer. It will take one hour of your time during the interview/discussions.

Benefits: for being involved in this study, you are not receiving any payment with no special privilege for you. Perhaps, participating and giving information for the questions plays a pivotal role in knowing the perceptions of mental health workers including trainees on violence in clinical psychiatry practice.

Confidentiality: Information will be confidential and will not be accessible to any third party. Any personal addresses will not be mentioned anywhere.

The right not to participate you have the right not to participate in the study, to stop at any time you want or not to give information for questions you do not want to answer. Finally, I acknowledge your participation and your response.

Principal investigator: Djibril Ibrahim Email: djibril.ibrahim32@gmail.com Telephone:

00251994450016.

**Annex II: Consent Form**

Dear participant: I am …………………………. I am collecting data for an investigator from

SPHMMC, who is conducting a study on knowledge and perceptions of mental health workers on violence in mental health practice in Addis Ababa Ethiopia: A qualitative study for partial fulfillment of his specialty training in psychiatry. The study team selected randomly, and your participation clarifies the topic of perceptions, attitudes and knowledge of mental health workers on violence in mental health practice at department of psychiatry of SPHMMC in Addis Ababa Ethiopia: A qualitative study. Therefore, here are some questions from interview guide for you to answer which are important for the study. For your participation in this study, you will not receive payment or have no special privilege given to you. Besides, you ae not obligated to answer any question that you do not wish to answer. If you feel uncomfortable responding to any of the questions, please feel free to jump it any time you wish. Filling the questionnaire will take about 10 minutes. The researchers will keep the information that you gave confidentially and no access to third party will happen. The gathered information will only be used for the research purpose and burnt after two years of study.

Are you volunteering to participate actively? Circle the one answer you prefer

1.

[No] End

2.

[Yes] Continue

**Annex III Study Tools: Demographic data, Focus group and in-depth interview guide:**

**Semi-structured interview**

Introduction to the study tools

Thanks for agreeing to take part in this focus group discussion studying the knowledge and

perception of psychiatry residents and psychiatry nurses on mental health workplace violence at Saint Paul’s Hospital in Addis Ababa, Ethiopia.

The study will be a qualitative study in which a moderator will lead the session in 45 to 60

minutes and you will answer a semi-structured question. A moderator will coordinate questions and participation of everybody will be encouraged.

This starts with a demographic data collection of the participants that will be collected from every participant. After the focus group discussions with those exposed to violence will have an in-depth interview. Moderator of the sessions will also document observations from interactions during interviews or reaction of the participants during the interview.

**Part I. Demographic Data**

1. Age _______________

2. Gender A. Male

B. Female

3. Level of professional training A. Psychiatry resident physician

B. Psychiatric nurse

C. Clinical nurse

4. Current Level of training A. First year resident physician

B. Second year resident physician

C. Third year resident physician

D. Psychiatry nurse

E. Clinical nurse working in psychiatry

5. Place of work A. Outpatient Clinic

B. Inpatient ward

C. Both

6. Did you have experience of being exposure to assault during psychiatry department work at Saint Paul’s Hospital?

A. Yes

B. No

7. If your answer is yes, what kind of violence do you have?

A. Verbal

B. Physical

C. Sexual

8. If your answer is yes, how many times have you had a violence experience at a workplace.

A. 1 time

B. 2 times

C. 3 times

D. 4 times

E. 5 or more times

9. How many years have you been exposed to violence?

A. None B. One year C. Two years and more

**Part II. Focus Group Discussion #**

Moderator

The moderator will introduce the session with the objectives; ground rules including switching off mobile phones and selecting the participants with characters like resident physician or a psychiatric nurse. Moderator will check if all demographic data is complete and those attending the session. An equal participation of the people attending will be encouraged throughout the session. 45 to 60 minutes will be the time for the FGD. The questions will follow the following format.

Refreshments will be served to participants after the session

Broad

Themes

Questions

**1.Knowledge of violence in Workplace violence**

1. What do you know about violence in mental health workplace?

2. What are the basic requirements for a safe workplace?

3. What are the perpetuators of violence in mental health services?

4. What is the type of violence towards mental health workers including resident

physicians, clinical and psychiatric nurses?

**2.Attitudes towards violence in workplace**

5. How would you react to violent behavior?

6. How would you support yourself/others in case of exposure to violent behavior?

7. Where do you expect violent behavior to happen in the mental health workplace?

**3.Perceptions of workplace violence**

8. What do you perceive as violent behavior?

9. When do you feel someone can have a violent behavior?

11. Do you feel your workplace is safe for you? If not, why is it not safe for your

practice?

12. What are your recommendations for a safer working environment for mental

health workers?

**Part III. In depth interview guide with psychiatry residents, clinical and psychiatric nurses assaulted during work at Saint Paul’s Hospital Millennium Medical College**

In-depth interview #

Moderator

Sorry to hear that you have been exposed to unfortunate violence during your work at Saint

Paul’s Hospital Millennium Medical College department of psychiatry. Here, I will ask you

several questions about your experience of violence at the workplace. Again, ground rules and

a suitable interview place. After consent the sessions will be audio taped for data analysis.

1. Where are you alone when you are exposed with violent behavior?

2. Can you express the type of assault you had in your clinical practice?

3. was the violence directed by the family of the patient or the patient themselves.

4. Could you express exactly what kind of violence experience you had in detail?

5. Did you seek help once you have had exposure to violent behavior?

6. Where did the incident happen?

7. How did you react to the violent incident?

8. Did you seek debriefing or consultation with your immediate senior for advice?

**Part IV. Observation of interactions during the FGD and in-depth interviews:**
